# Supplementary material for: Two-dimensional MgX2Se4 (X = Al, Ga) monolayers with tunable electronic properties for optoelectronic and photocatalytic applications
Source: Royal Society of Chemistry journal article supplement (doi:10.1039/c9nr07529a), 2019-01-01
Supplement: c9nr07529a1.pdf [file c9nr07529a1.pdf]

## Electronic Supplementary Information

### **Two-dimensional $\text{MgX}_2\text{Se}_4$ ( $\text{X}=\text{Al}, \text{Ga}$ ) Monolayer with Tunable Electronic Properties for Optoelectronic and Photocatalytic Applications**

Pengfei Li<sup>a,†</sup>, Wei Zhang<sup>b,c,†</sup>, Changhao Liang<sup>\*a</sup> and Xiao Cheng Zeng<sup>\*c,d</sup>

<sup>a</sup>Key Laboratory of Materials Physics and Anhui Key Laboratory of Nanomaterials and Nanotechnology, Institute of Solid State Physics, Chinese Academy of Sciences, Hefei 230031, China.

<sup>b</sup>Beijing Advanced Innovation Center for Soft Matter Science and Engineering, Beijing University of Chemical Technology, Beijing 100029, P. R. China

<sup>c</sup>Department of Chemistry, University of Nebraska-Lincoln, Lincoln, Nebraska 68588, United States

<sup>d</sup>Department of Chemical & Biomolecular Engineering and Department of Mechanical & Materials Engineering, University of Nebraska-Lincoln, Lincoln, Nebraska 68588, United States

\*Corresponding authors.

E-mail: chliang@issp.ac.cn (Changhao Liang); xzeng1@unl.edu (Xiao Cheng Zeng)

## Calculation method for photocatalytic OER and HER overpotentials

We compute the theoretical overpotential for the OER and HER by using DFT methods and the computational hydrogen electrode model.<sup>1</sup> This method has been shown to be successful in predicting trend of electrochemical activity on oxide surfaces<sup>2,3</sup> and metal embedded nitrogen-doped graphene (M-NG)<sup>4,5</sup>. For OER, the overall reaction scheme can be expressed as:

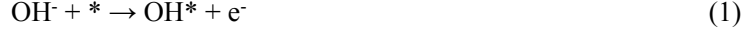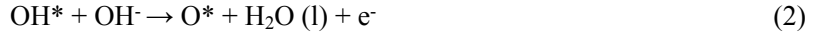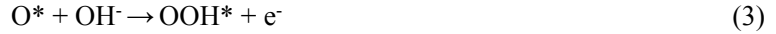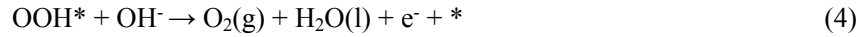

As for HER, the overall reaction scheme can be written as:

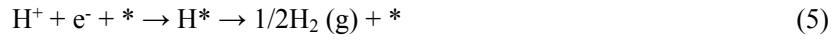

For each elementary step in OER and HER, the Gibbs reaction free energy  $\Delta G$  is defined as the difference between free energies of the initial and final states, and is given by the following expression:

$$\Delta G = \Delta E + \Delta \text{ZPE} - T\Delta S + \Delta G_U + \Delta G_{pH} \quad (6)$$

where  $\Delta E$  is the computed reaction energy of reactant and product molecules adsorbed on catalyst surface;  $\Delta \text{ZPE}$  and  $\Delta S$  are the change in zero-point energies and entropy in the reaction. The bias effect on the free energy of each initial, intermediate and final state involving electron transfer in the electrode is also taken into account by shifting the energy of the state by  $\Delta G_U = -neU$ , where  $U$  is the applied electrode potential,  $e$  is the transferred charge, and  $n$  is the number of proton-electron transferred pairs. The change in free energy due to the effect of pH value of the electrolyte is considered by the correction of  $\text{H}^+$  concentration ( $[\text{H}^+]$ ),  $\Delta G_{pH} = -k_B T \ln [\text{H}^+] = pH \times k_B T \ln 10$ , where  $k_B$  is the Boltzmann constant and  $T$  is the temperature (298 K). Given that the high-spin ground state of the oxygen molecule is poorly described in DFT calculations, the free energy of the  $\text{O}_2$  molecule is determined by  $G_{\text{O}_2}(\text{g}) = 2G_{\text{H}_2\text{O}}(\text{l}) - 2G_{\text{H}_2}(\text{g}) + 4 \times 1.23(\text{eV})$ . The free energy of  $\text{OH}^-$  is derived as  $G_{\text{OH}^-} = G_{\text{H}_2\text{O}}(\text{l}) + e^- - 1/2G_{\text{H}_2}(\text{g})$ . The free energy of gas-phase water is calculated at 0.035 bars because this is the equilibrium pressure in contact with liquid water at 298 K. The free energy of gas-phase water at these conditions is equal to the free energy of liquid water.

To evaluate the adsorption strength of  $\text{OH}^*$ ,  $\text{O}^*$  and  $\text{OOH}^*$ , the adsorption energy of these species is calculated by using DFT method with the equation:

$$E_{\text{ads}} = E_{\text{total}} - E_{\text{catalyst}} - E_{\text{adsorbate}}, \quad (7)$$

where,  $E_{\text{catalyst}}$  is the energy of the bare catalyst,  $E_{\text{adsorbate}}$  is the energy of the free O, OH OOH or H species in the gas phase, and  $E_{\text{total}}$  is the total energy of the catalyst with adsorbents. Based on

the adsorption energies, we can obtain the adsorption free energy of  $O^*$ ,  $OH^*$ ,  $OOH^*$  and  $H^*$ . To obtain the exact free energy of  $O^*$ ,  $OH^*$ ,  $OOH^*$  and  $H^*$  radicals in the electrolyte solution, the adsorption free energies  $\Delta G_{O^*}$ ,  $\Delta G_{OH^*}$ ,  $\Delta G_{OOH^*}$  and  $\Delta G_{H^*}$  are relative to the free energy of appropriate stoichiometric amounts of  $H_2O(g)$  and  $H_2(g)$ , defined as follows:

$$\begin{aligned}\Delta G_{O^*} &= \Delta G(H_2O(g) + ^* \rightarrow O^* + H_2(g)) \\ &= (E_{O^*} + E_{H_2} - E_{H_2O} - E_*) + (E_{ZPE(O^*)} + E_{ZPE(H_2)} - E_{ZPE(H_2O)} - E_{ZPE(^*)}) \\ &\quad - T \times (S_{O^*} + S_{H_2} - S_{H_2O} - S_*)\end{aligned}\quad (8)$$

$$\begin{aligned}\Delta G_{OH^*} &= \Delta G(H_2O(g) + ^* \rightarrow OH^* + 1/2H_2(g)) \\ &= (E_{OH^*} + 1/2E_{H_2} - E_{H_2O} - E_*) + (E_{ZPE(OH^*)} + 1/2E_{ZPE(H_2)} - E_{ZPE(H_2O)} - E_{ZPE(^*)}) \\ &\quad - T \times (S_{OH^*} + 1/2S_{H_2} - S_{H_2O} - S_*)\end{aligned}\quad (9)$$

$$\begin{aligned}\Delta G_{OOH^*} &= \Delta G(2H_2O(g) + ^* \rightarrow OOH^* + 3/2H_2(g)) \\ &= (E_{OOH^*} + 3/2E_{H_2} - 2E_{H_2O} - E_*) + (E_{ZPE(OOH^*)} + 3/2E_{ZPE(H_2)} - 2E_{ZPE(H_2O)} - E_{ZPE(^*)}) \\ &\quad - T \times (S_{OOH^*} + 3/2S_{H_2} - 2S_{H_2O} - S_*)\end{aligned}\quad (10)$$

$$\begin{aligned}\Delta G_{H^*} &= \Delta G(H^+ + e^- + ^* \leftrightarrow H^*) \\ &= (E_{H^*} - 1/2E_{H_2} - E_*) + (E_{ZPE(H^*)} - 1/2E_{ZPE(H_2)} - E_{ZPE(^*)}) - T \times (S_{H^*} - 1/2S_{H_2} - S_*)\end{aligned}\quad (11)$$

The reaction free energy of (1)-(4) for the OER can be determined from the following equations:

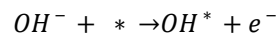

$$\begin{aligned}\Delta G_1 &= G_{OH^*} + G_{e^-} - G_{OH^-} - G_* \\ &= G_{OH^*} + G_{e^-} - (G_{H_2O(l)} + G_{e^-} - 1/2G_{H_2(g)}) - G_* \\ &= G_{OH^*} + 1/2G_{H_2(g)} - G_{H_2O(l)} - G_* \\ &= \Delta G_{OH^*}\end{aligned}$$

(12)

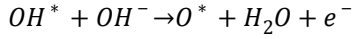

$$\begin{aligned}\Delta G_2 &= G_{O^*} + G_{H_2O} + G_{e^-} - G_{OH^-} - G_{OH^*} \\ &= G_{O^*} + G_{H_2O} + G_{e^-} - (G_{H_2O}(l) + G_{e^-} - 1/2 G_{H_2}(g)) - G_{OH^*} \\ &= (G_{O^*} + G_{H_2} - G_{H_2O}(l) - G_{*}) - (G_{OH^*} + 1/2 G_{H_2}(g) - G_{H_2O}(l) - G_{*}) \\ &= \Delta G_{O^*} - \Delta G_{OH^*}\end{aligned}\tag{13}$$

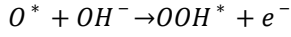

$$\begin{aligned}\Delta G_3 &= G_{OOH^*} + G_{e^-} - G_{O^*} - G_{OH^-} \\ &= G_{OOH^*} + G_{e^-} - G_{O^*} - (G_{H_2O}(l) + G_{e^-} - 1/2 G_{H_2}(g)) \\ &= (G_{OOH^*} + 3/2 G_{H_2}(g) - 2 G_{H_2O}(l) - G_{*}) - (G_{O^*} + G_{H_2}(g) - G_{H_2O}(l) - G_{*}) \\ &= \Delta G_{OOH^*} - \Delta G_{O^*}\end{aligned}\tag{14}$$

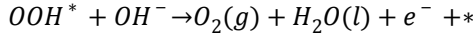

$$\begin{aligned}\Delta G_4 &= G_{O_2}(g) + G_{H_2O}(l) + G_{e^-} + * - G_{OOH^*} - G_{OH^-} \\ &= (2 G_{H_2O}(l) - 2 G_{H_2}(g) + 4 \times 1.23) + G_{H_2O}(l) + G_{e^-} + * \\ &\quad - G_{OOH^*} - (G_{H_2O}(l) + G_{e^-} - 1/2 G_{H_2}(g)) \\ &= 2 G_{H_2O}(l) - 1/2 G_{H_2}(g) + * - G_{OOH^*} \\ &= 4.92 - \Delta G_{OOH^*}\end{aligned}\tag{15}$$

With this approach, the theoretical overpotential ( $\eta^{OER}$ ) at standard conditions is defined as:

$$\eta^{OER} = (G^{OER} / e) - 1.23\tag{16}$$

where  $G^{OER}$  is the potential determining step defined as the highest free energy step in the process of OER and  $e$  is unit charge.

The HER performance is examined by computing the reaction free energy ( $\Delta G_{H^*}$ ) for H adsorption based on the computational hydrogen electrode model<sup>[1]</sup> at 0 eV. That is, the equilibrium potential of the HER:

$$\Delta G_{H^*} = \Delta E_H + \Delta E_{ZPE(H)} - T\Delta S_H\tag{17}$$

$\Delta E_H$  is the hydrogen adsorption energy based on DFT calculation.  $\Delta E_{ZPE(H)}$  is the zero-point

energy difference between the hydrogen adsorbed state and the gas-phase state of hydrogen obtained from vibrational frequency calculation.  $\Delta S_H$  is the entropy difference due to hydrogen adsorption. Here we approximate the entropy changes of hydrogen adsorption as  $\Delta S_H \approx 1/2(\Delta S_{H_2})$ , where  $\Delta S_{H_2}$  is the entropy of gas phase  $H_2$  at standard conditions (25 °C, 1 bar). The theoretical overpotential  $\eta$  for HER is determined by  $\Delta G_{H^*}$  :

$$\eta^{\text{HER}} = |\Delta G_{H^*}| / e \quad (18)$$

Like previous theoretical studies<sup>6</sup>,  $H^*$ ,  $OH^*$  and  $OOH^*$  can form H-bonds with  $H_2O$  due to the solvent effect. Hence, their adsorption free energies decrease. Here, the correction energies are added to the electronic energy of the state to represent the total Gibbs free energy of the state. The latter will be used to calculate the Gibbs free energy of reaction.

**Table S1.** Computed zero-point energies, entropy and the corrections ( $\Delta G_{\text{corr}}$  (eV)) of the adsorbates presented in the reaction.

|        | $\Delta ZPE(\text{eV})$    |                            | $T\Delta S(\text{eV})$ | $\Delta G_{\text{corr}}(\text{eV})$ |
|--------|----------------------------|----------------------------|------------------------|-------------------------------------|
|        | $\text{MgGa}_2\text{Se}_4$ | $\text{MgAl}_2\text{Se}_4$ |                        |                                     |
| $H_2O$ | 0.57                       | 0.57                       | 0.58                   |                                     |
| $H_2$  | 0.27                       | 0.27                       | 0.41                   |                                     |
| $H$    | 0.13                       | 0.13                       |                        | 0.11                                |
| $O$    | 0.07                       | 0.07                       |                        |                                     |
| $OH$   | 0.34                       | 0.41                       |                        | 0.30                                |
| $OOH$  | 0.37                       | 0.37                       |                        | 0.40                                |

**Table S2.** Computed adsorption free energy (eV) of the adsorbates in the reaction, and the overpotentials (V) for HER and ORR.

|                            | $\Delta G_H(\text{eV})$ | $\Delta G_O(\text{eV})$ | $\Delta G_{OH}(\text{eV})$ | $\Delta G_{OOH}(\text{eV})$ | $\eta^{\text{HER}}(\text{V})$ | $\eta^{\text{OER}}(\text{V})$ |
|----------------------------|-------------------------|-------------------------|----------------------------|-----------------------------|-------------------------------|-------------------------------|
| $\text{MgGa}_2\text{Se}_4$ | 0.82                    | 2.17                    | 1.28                       | 4.50                        | 0.70                          | 0.82                          |
| $\text{MgAl}_2\text{Se}_4$ | 0.99                    | 2.57                    | 1.45                       | 4.82                        | 0.62                          | 0.99                          |

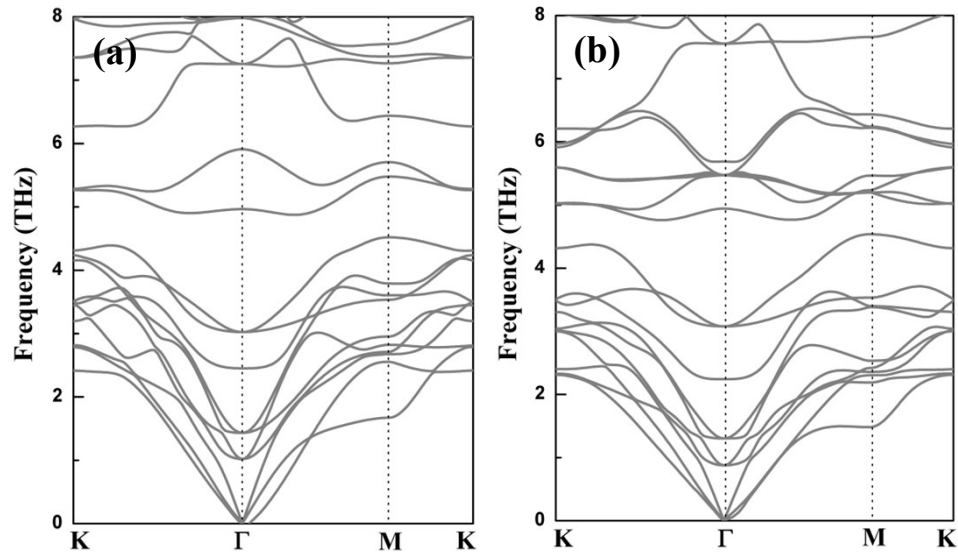

**Figure S1.** Computed phonon spectra of the monolayer (a)  $\text{MgAl}_2\text{Se}_4$  and (b)  $\text{MgGa}_2\text{Se}_4$ .

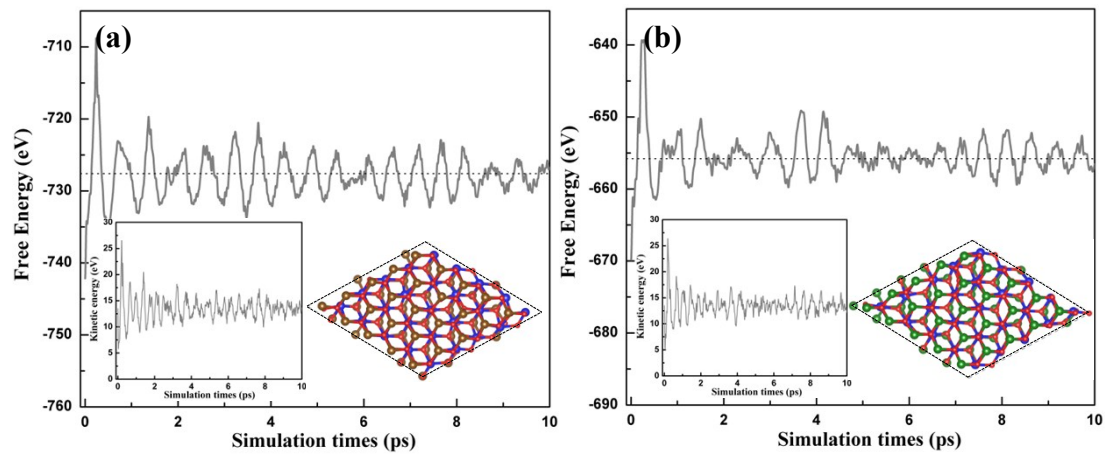

**Figure S2.** The free energy and kinetic energy versus the AIMD simulation steps; final equilibrium structures (inset) at  $T = 600$  K for (a) monolayer  $\text{MgAl}_2\text{Se}_4$  and (b) monolayer  $\text{MgGa}_2\text{Se}_4$ , respectively.

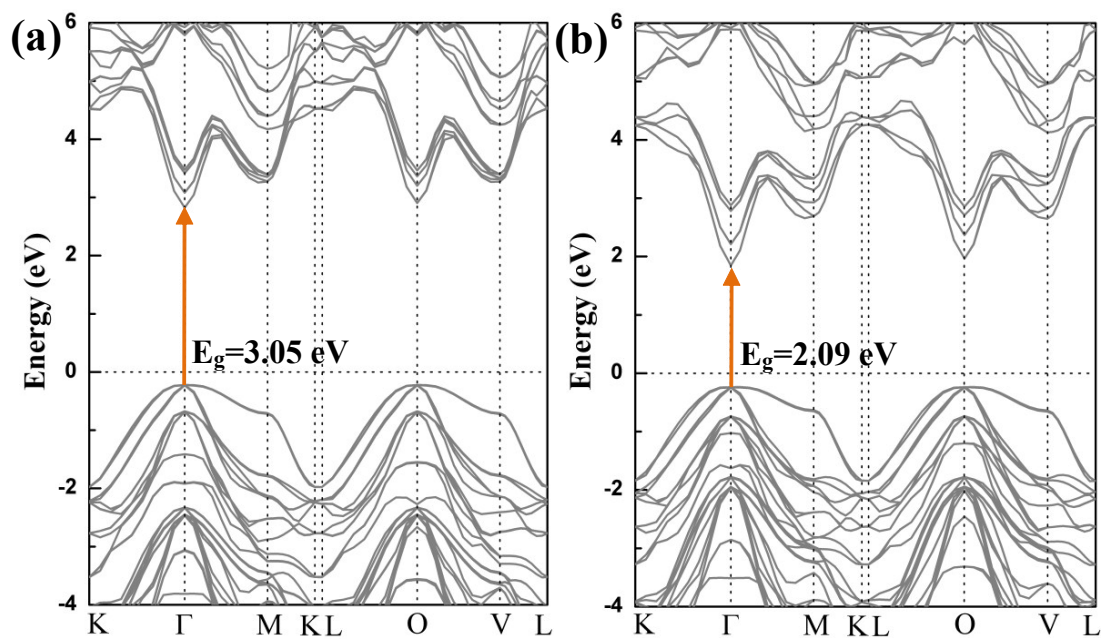

**Figure S3.** Computed band structures of (a) bulk  $\text{MgAl}_2\text{Se}_4$  and (b) bulk  $\text{MgGa}_2\text{Se}_4$  at the HSE06 level. The Fermi level is set to 0 eV.

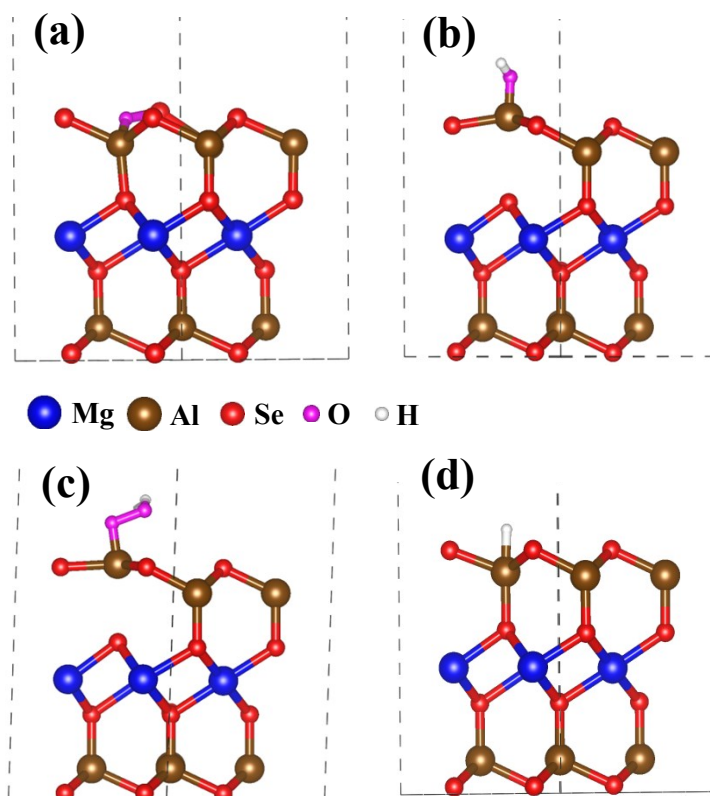

**Figure S4.** Atomic structure of adsorbate on the surface of monolayer  $\text{MgAl}_2\text{Se}_4$ . (a) O, (b) OH, (c) OOH, (d) H.

### Supplementary Reference

- (1) J. K. Nørskov, J. Rossmeisl, A. Logadottir, L. Lindqvist, J. R. Kitchin, T. Bligaard, H. Jonsson, *The Journal of Physical Chemistry B*, 2004, **108**, 17886.
- (2) I. C. Man, H. Y. Su, F. Calle-Vallejo, H. A. Hansen, J. I. Martínez, N. G. Inoglu, J. Kitchin, T. F. Jaramillo, J. K. Nørskov, J. Rossmeisl, *ChemCatChem*, 2011, **3**, 1159.
- (3) M. García-Mota, M. Bajdich, V. Viswanathan, A. Vojvodic, A. T. Bell, J. K. Nørskov, *J. Phys. Chem. C*, 2012, **116**, 21077.
- (4) J. Guan, Z. Duan, F. Zhang, S. D. Kelly, R. Si, M. Dupuis, Q. Huang, J. Q. Chen, C. Tang, C. Li, *Nature Catalysis*, 2018, **1**, 870.
- (5) H. Xu, D. Cheng, D. Cao, X. C. Zeng, *Nature Catalysis*, 2018, **1**, 339.
- (6) J. H. Montoya, M. Garcia-Mota, J. K. Nørskov, A. Vojvodic, *Phys. Chem. Chem. Phys.*, 2015, **17**, 2634.
